# Supplementary material
Source: Springer Nature journal article supplement (https://www.springermedizin.de/resource/supplementary/13014_2006_42_MOESM1_ESM.pdf/9632798)

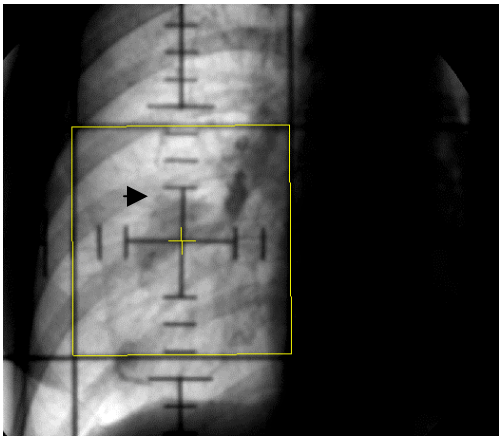

A = expiration

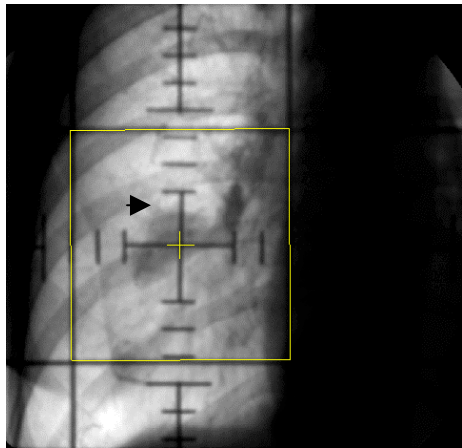

B = inspiration

Supplement: MOESM1 [file 9632798]
